# Supplementary material
Source: Springer Nature journal article supplement (https://www.springermedizin.de/resource/supplementary/13058_2012_3172_MOESM14_ESM.pdf/9703436)

**a**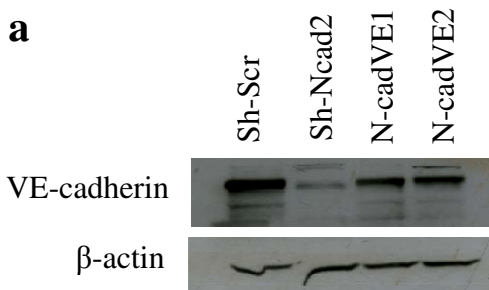**b**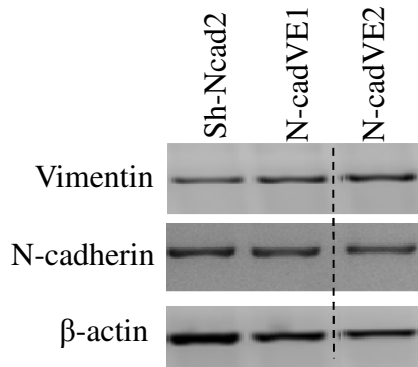**c**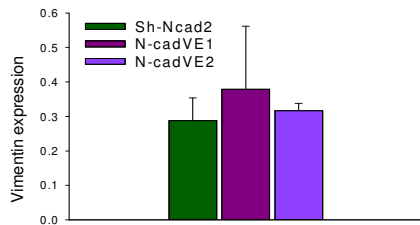**d**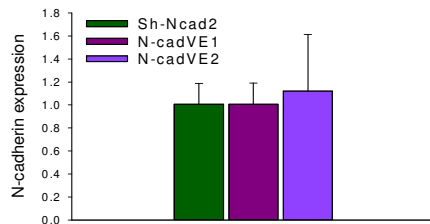**e**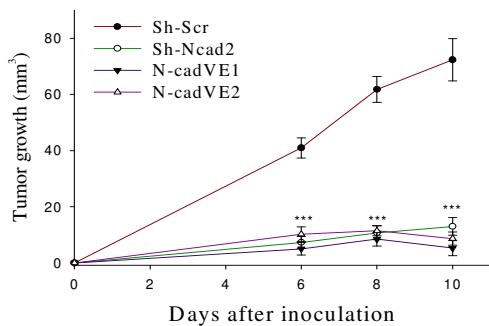

Supplement: MOESM14 [file 9703436]
